# Supplementary material for: Role of the ESAT-6 secretion system in virulence of the emerging community-associated Staphylococcus aureus lineage ST398
Source: PubMed Central journal article supplement (PMC4844983; doi:10.1038/srep25163), 2016-04-26
Supplement: srep25163-s1.pdf [file srep25163-s1.pdf]

**Role of the ESAT-6 secretion system in virulence of the emerging community-associated *Staphylococcus aureus* lineage ST398**

Yanan Wang, Mo Hu, Qian Liu, Juanxiu Qin, Yingxin Dai, Lei He, Tianming Li, Bing Zheng, Fan Zhou, Kaiwen Yu, Jingyuan Fang, Xiaoyun Liu, Michael Otto, Min Li

**Supplementary Information**

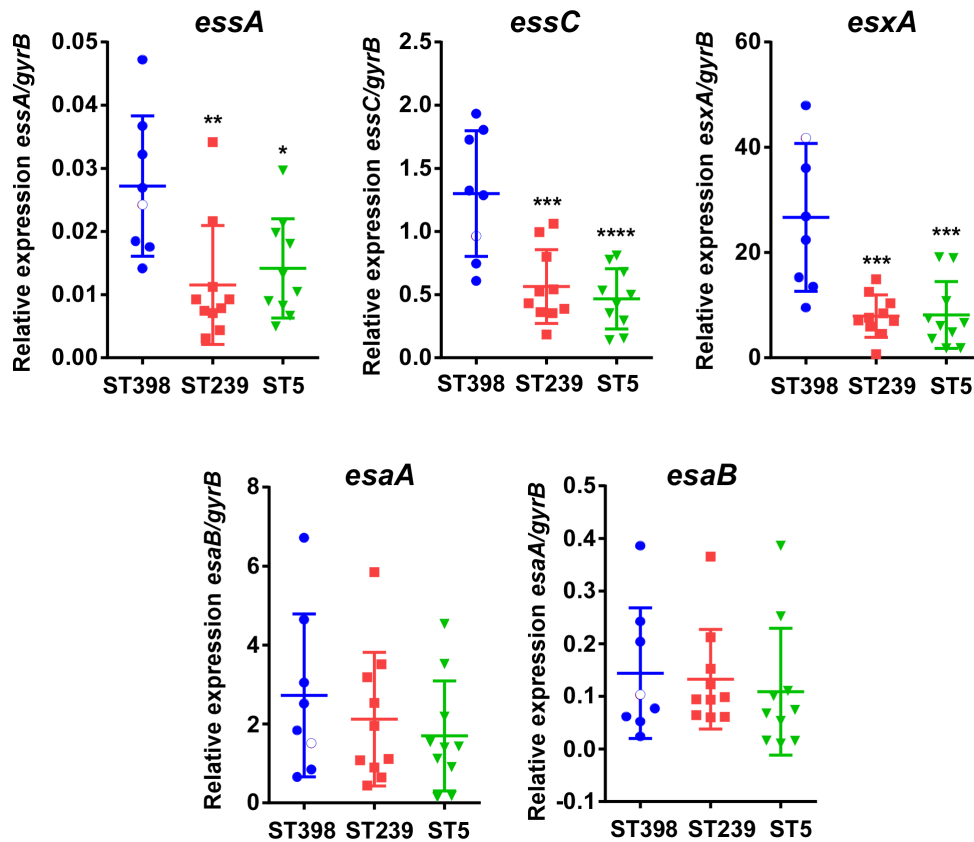

**Fig. S1. Expression of ESS genes in CA-SA ST398 versus HA-SA randomly selected isolates.** Data are from culture grown for 4 h. The empty circles represent the data corresponding to the isolate selected for genetic deletion. \*,  $p < 0.05$ ; \*\*,  $p < 0.01$ ; \*\*\*,  $p < 0.001$ ; \*\*\*\*,  $p < 0.0001$  (1-way ANOVA, Dunnett's post test vs. ST398).

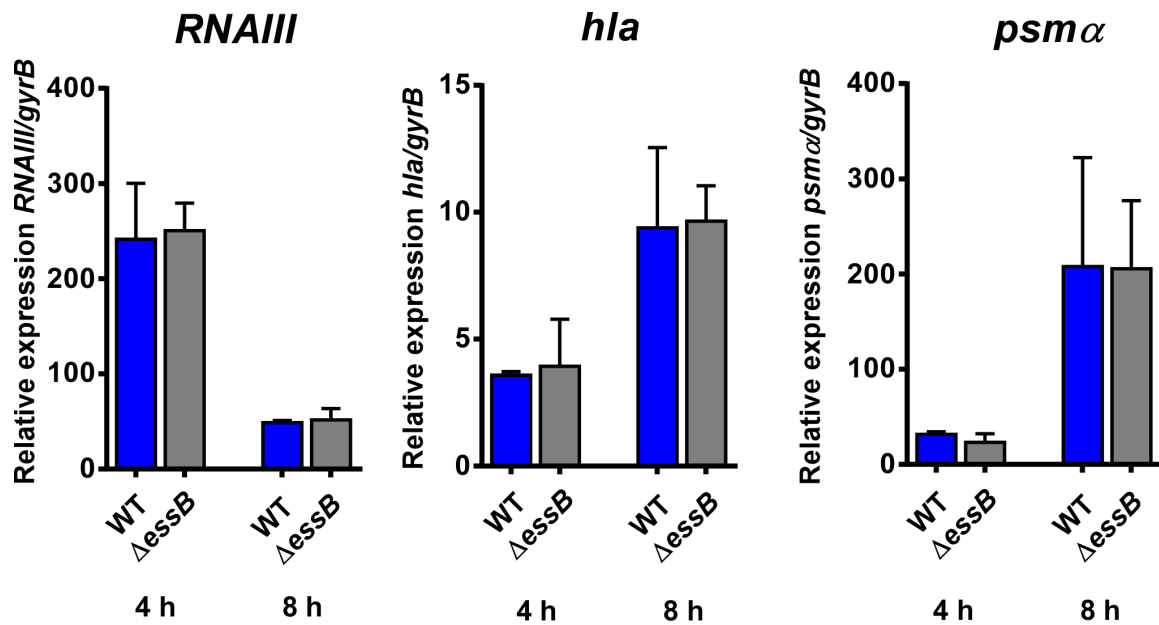

Fig. S2. Expression of *RNAIII* (*Agr*), *hla*, and *psmα* in ST398 wild-type versus *essB* deletion mutant strains at 4 and 8 h of growth.

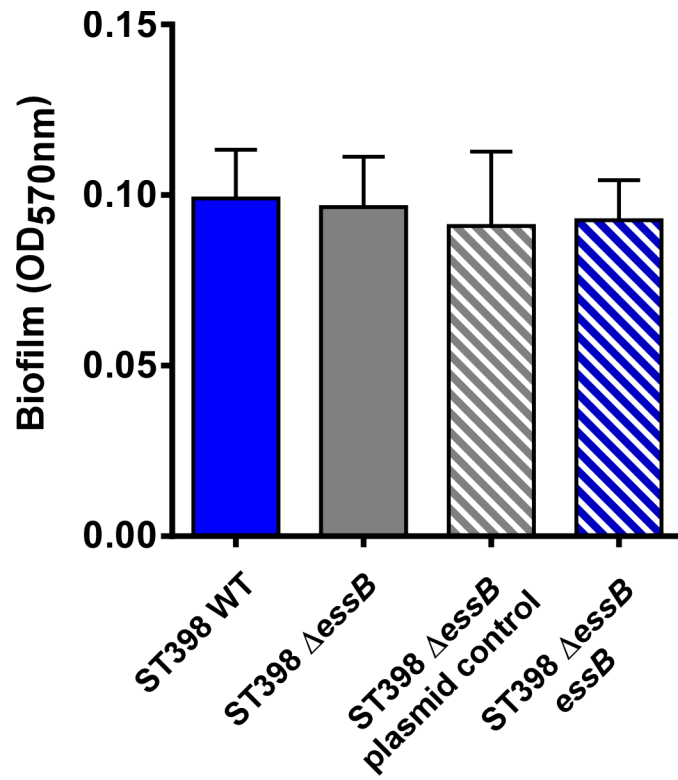

**Fig. S3. Biofilm formation by ST398 wild-type, *essB* deletion mutant, complemented mutant, and control strains.**

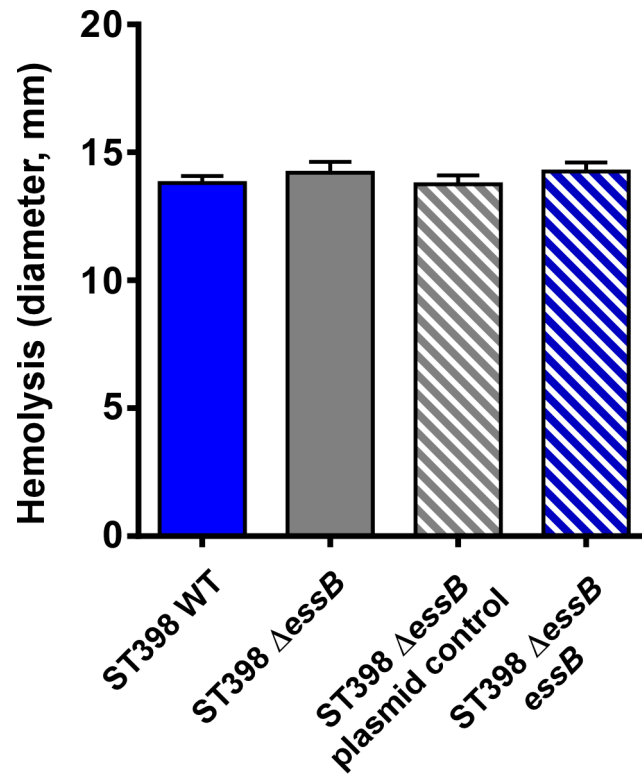

**Fig. S4. Hemolysis by ST398 wild-type, *essB* deletion mutant, complemented mutant, and control strains.**

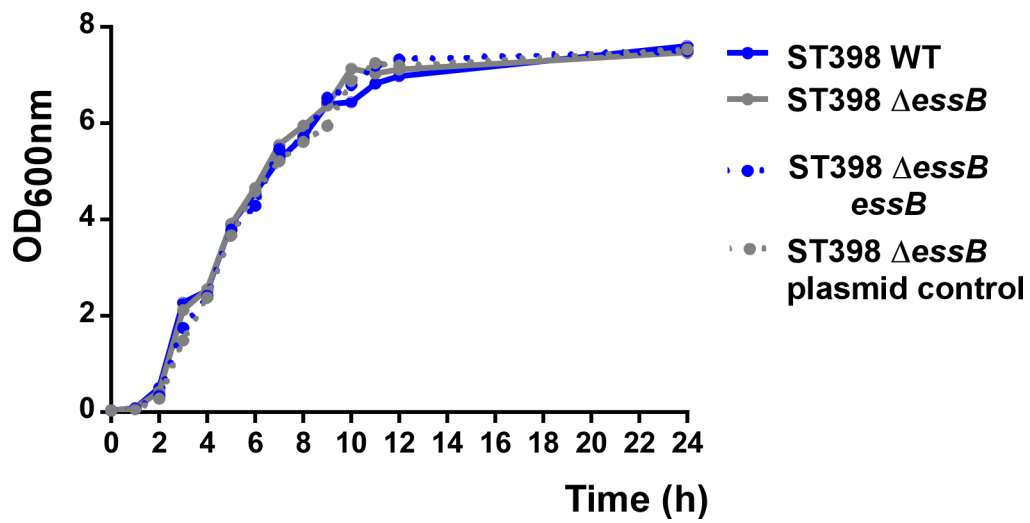

Fig. S5. Growth curves of strains used in this study.
